# Supplementary material
Source: MDPI journal article supplement (https://www.mdpi.com/2304-6767/10/8/152)

**Table S1** Detail sequencing data of nine samples.

| group | sample | original CCS<br>sequences | CCS<br>sequences<br>after primer<br>removal | valid CCS<br>sequences | average length<br>of valid CCS<br>sequences (bp) |
|-------|--------|---------------------------|---------------------------------------------|------------------------|--------------------------------------------------|
| CG    | CPH    | 11203                     | 10521                                       | 10510                  | 1461                                             |
|       | CPR    | 10905                     | 9971                                        | 9950                   | 1460                                             |
|       | CPF    | 12167                     | 11705                                       | 11695                  | 1453                                             |
| AG    | APH    | 11004                     | 10527                                       | 10517                  | 1461                                             |
|       | APR    | 12949                     | 12132                                       | 12107                  | 1461                                             |
|       | APF    | 14134                     | 13439                                       | 13433                  | 1464                                             |
| HG    | HP1    | 17972                     | 17212                                       | 17200                  | 1454                                             |
|       | HP2    | 11999                     | 11569                                       | 11565                  | 1453                                             |
|       | HP3    | 13865                     | 13254                                       | 13222                  | 1459                                             |

CCS: Circular Consensus Sequences.

**Table S2** Species diversity index of nine samples.

| group | sample | Chao1 | shannon | observed-species | ace    | simpson | PD-whole-tree |
|-------|--------|-------|---------|------------------|--------|---------|---------------|
| CG    | CPH    | 291.5 | 4.54    | 197.0            | 270.14 | 0.92    | 27.25         |
|       | CPR    | 226.7 | 3.14    | 197.0            | 230.78 | 0.75    | 29.29         |
|       | CPF    | 186.1 | 5.53    | 168.0            | 183.81 | 0.95    | 25.06         |
| AG    | APH    | 195.2 | 4.78    | 163.0            | 199.93 | 0.93    | 24.86         |
|       | APR    | 175.0 | 4.39    | 134.0            | 185.31 | 0.92    | 21.10         |
|       | APF    | 142.5 | 4.16    | 117.0            | 155.04 | 0.92    | 18.47         |
| HG    | HP1    | 182.0 | 5.24    | 151.0            | 181.69 | 0.96    | 22.94         |
|       | HP2    | 137.1 | 4.79    | 116.0            | 139.09 | 0.93    | 17.18         |
|       | HP3    | 240.5 | 3.68    | 198.0            | 246.15 | 0.79    | 26.67         |

**Table S3** Species annotation of nine samples.

| group | sample | kingdom | phylum | class | order | family | genus | species |
|-------|--------|---------|--------|-------|-------|--------|-------|---------|
|       | CPH    | 1       | 10     | 19    | 32    | 52     | 79    | 129     |

|    |     |   |    |    |    |    |    |     |
|----|-----|---|----|----|----|----|----|-----|
| CG | CPR | 1 | 10 | 21 | 36 | 58 | 83 | 124 |
|    | CPF | 1 | 9  | 18 | 30 | 47 | 67 | 101 |
|    | APH | 1 | 10 | 18 | 30 | 47 | 68 | 102 |
| AG | APR | 1 | 7  | 18 | 27 | 48 | 65 | 91  |
|    | APF | 1 | 8  | 14 | 24 | 41 | 53 | 77  |
|    | HP1 | 1 | 9  | 18 | 27 | 39 | 58 | 90  |
| HG | HP2 | 1 | 6  | 13 | 24 | 35 | 48 | 77  |
|    | HP3 | 1 | 10 | 18 | 31 | 51 | 78 | 130 |

**Table S4** Species difference analysis between porcelain crowns and no-prostheses.

| taxonomy | species           | mean   |        | P value |
|----------|-------------------|--------|--------|---------|
|          |                   | CG     | HG     |         |
| phylum   | Firmicutes        |        |        |         |
| genus    | Peptoanaerobacter | 0.002  | 0.0004 | 0.014   |
| genus    | Gemella           | 0.001  | 0.004  | 0.017   |
| genus    | Granulicatella    | 0.0005 | 0.004  | 0.027   |
| genus    | Aminipila         | 0.0004 | 0      | 0.034   |
| genus    | Parvimonas        | 0.006  | 0.002  | 0.045   |
| phylum   | Proteobacteria    |        |        |         |
| genus    | Pantoea           | 0.0003 | 0.0001 | 0.013   |
| genus    | Haemophilus       | 0.016  | 0.002  | 0.035   |
| phylum   | Actinobacteria    |        |        |         |
| genus    | Schaalia          | 0.0005 | 0.004  | 0.046   |

**Table S5** Species difference analysis between all-ceramic crowns and and no-prostheses.

| taxonomy | species        | mean  |        | P value |
|----------|----------------|-------|--------|---------|
|          |                | AG    | HG     |         |
| phylum   | Firmicutes     |       |        |         |
| genus    | Gemella        | 0.042 | 0.004  | <0.001  |
| genus    | Peptococcus    | 0     | 0.0005 | 0.001   |
| genus    | Granulicatella | 0.066 | 0.004  | 0.015   |

|        |                    |        |        |       |
|--------|--------------------|--------|--------|-------|
| genus  | Stomatobaculum     | 0      | 0.0004 | 0.016 |
| genus  | Abiotrophia        | 0.009  | 0.0004 | 0.042 |
| genus  | Peptostreptococcus | 0.004  | 0.001  | 0.048 |
| phylum | Proteobacteria     |        |        |       |
| genus  | Haemophilus        | 0.048  | 0.002  | 0.008 |
| genus  | Acinetobacter      | 0.0002 | 0      | 0.018 |
| phylum | Actinobacteria     |        |        |       |
| genus  | Actinomyces        | 0.001  | 0.008  | 0.021 |

**Table S6** Species difference analysis between porcelain crowns and all-ceramic crowns.

| taxonomy | species             | mean   |         | P value |
|----------|---------------------|--------|---------|---------|
|          |                     | CG     | AG      |         |
| phylum   | Firmicutes          | 0.183  | 0.354   | <0.001  |
| genus    | Gemella             | 0.001  | 0.042   | <0.001  |
| genus    | Peptoanaerobacter   | 0.002  | 0.0004  | 0.002   |
| genus    | Granulicatella      | 0.0005 | 0.066   | 0.008   |
| genus    | Parvimonas          | 0.006  | 0.00003 | 0.009   |
| genus    | Streptococcus       | 0.055  | 0.160   | 0.017   |
| genus    | Peptostreptococcus  | 0.0007 | 0.004   | 0.018   |
| genus    | Aminipila           | 0.0004 | 0       | 0.027   |
| genus    | Abiotrophia         | 0      | 0.009   | 0.034   |
| genus    | Lachnoanaerobaculum | 0.003  | 0.00003 | 0.037   |
| genus    | Veillonella         | 0.013  | 0.054   | 0.038   |
| genus    | Selenomonas         | 0.017  | 0.001   | 0.040   |
| phylum   | Actinobacteria      |        |         |         |
| genus    | Schaalia            | 0.0005 | 0.006   | 0.014   |
| phylum   | Proteobacteria      |        |         |         |
| genus    | Haemophilus         | 0.016  | 0.048   | 0.028   |
| genus    | Campylobacter       | 0.002  | 0.0004  | 0.036   |

**Figure S1** Sample dilution curve (a) and rank abundance curve (b) of samples. (a) When the curve



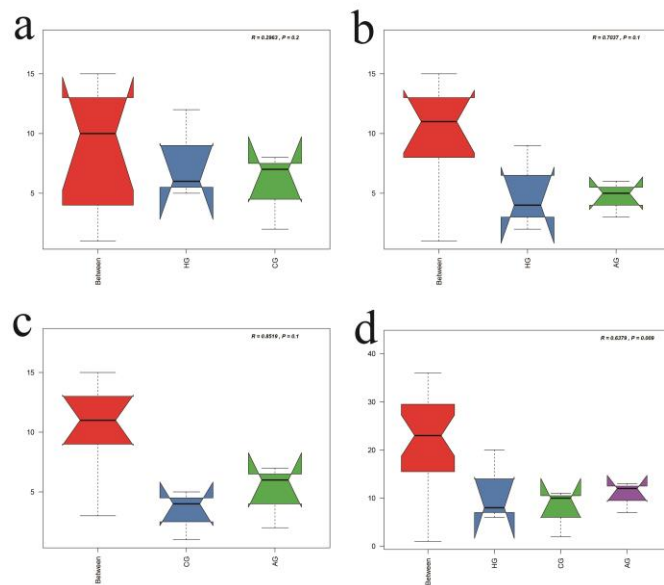

Supplement: s1 [file s1]
